# Supplementary material for: Conversion of fructose to 5-hydroxymethylfurfural using ionic liquids prepared from renewable materials
Source: Royal Society of Chemistry journal article supplement (doi:10.1039/b810392e), 2008-01-01
Supplement: b810392e.pdf [file b810392e.pdf]

# Supporting Information for

## Conversion of fructose to 5-hydroxymethylfurfural using ionic liquids prepared from renewable materials

Suqin Hu, Zhaofu Zhang, Yinxi Zhou, Buxing Han\*, Honglei Fan, Wenjing Li, Jinliang Song, and  
Ye Xie

Beijing National Laboratory for Molecular Sciences, Institute of Chemistry, Chinese Academy of  
Sciences, Beijing 100080, China

\*Corresponding author: E-mail: [Hanbx@iccas.ac.cn](mailto:Hanbx@iccas.ac.cn); Fax: 86-10-62562821

### Materials

D-Fructose (99%) was purchased from Alfa Aesar, 5-hydroxymethylfurfural (99%) was purchased from Aldrich, and the other starting materials (A. R. grade) were purchased from Beijing Chemical Reagents Company and used without further purification.

### Analysis methods

#### *The methods of analysis of fructose and HMF by HPLC*

**5-hydroxymethylfurfural (HMF):** Supelcosil LC-18 5 $\mu$ m column at 25 °C, Shimadzu LC-20AT pump, Sama UV-Vis LC-830 detector at 282.0 nm, methanol/water (50/50 V/V) as flowing phase at 0.8 mL/min. And the amount of HMF was calculated by using an external standard.

**Fructose:** Hypersil NH2 5 $\mu$ m column at 40 °C, Shimadzu LC-20AT pump, Shimadzu RID-10A detectors at 40 °C, acetonitrile/water (75/25 V/V) as flowing phase at 0.8 mL/min. And the amount of fructose was calculated by using an external standard.

#### *HMF Characterization*

HMF was characterized by <sup>1</sup>H NMR spectra which was recorded as solutions in CDCl<sub>3</sub> at room temperature on a Bruker spectrometer at 400 MHz and by GC/MS (GC: Agilent technologies 6890N; MS: Agilent technologies 5973 inert MS Detector)

**5-hydroxymethylfurfural (2):** M.S.: m/z (% of max intensity) 50 (8), 69 (32), 81 (7), 97 (100), 109 (11), 126 (75); <sup>1</sup>H NMR (400M, CDCl<sub>3</sub>) δ (ppm): 4.75 (s, 2 H), 6.54 (d, *J*=3.4 Hz, 1 H), 7.24 (d, *J*=3.4 Hz, 1 H), 9.62 (s, 1 H).

## **Experimental procedures**

### ***Preparation of the choline chloride-based ILs***

The ILs were synthesized following the procedures reported in the literature.<sup>S1,S2</sup> The molar ratios of the choline chloride (ChoCl) and molecular donors of the ILs are given in Supporting Table S1.

### ***General procedures of conversion of fructose to HMF in ILs***

Fructose (99%) (91.0 mg, 0.5 mmol) and known amount of IL were added into the reactor in a constant temperature oil bath, and the reaction system was stirred for desired time. After reaction, the reactor was cooled to room temperature immediately. The yields and conversions were analyzed by HPLC. Each reaction had been repeated at least three times.

### ***Biphasic procedure***

Fructose (99%) (91.0 mg, 0.5 mmol) and choline chloride/citric acid (1.47 g, 3 mmol) were added into the reactor in a constant temperature oil bath of 80 °C. After stirring for 1 min, the desired amount of ethyl acetate was added into the reactor. After reaction, the reaction system was cooled to room temperature. Then the ethyl acetate phase was poured out from the reactor and collected. The amounts of HMF in the two phases were analyzed by HPLC respectively and the yield was calculated. Each procedure had been repeated at least three times.

### ***The procedure of intermittent extraction in the biphasic reaction system***

Fructose (99%) (91.0 mg, 0.5 mmol) and choline chloride/citric acid (1.47 g, 3 mmol) were added into the reactor in a constant temperature oil bath of 80 °C. After stirring for 1 min, ethyl acetate

(1.47 g) was added into the above mixture. The reaction system was stirred for 20 min at 80 °C. Then the reactor was taken out from the constant temperature oil bath and the ethyl acetate phase was poured out and collected. The above procedures were repeated other two times, and the ethyl acetate solutions collected in the three runs were combined. The amounts of HMF in the two phases were analyzed by HPLC respectively and the yield was calculated. This procedure had been repeated at least three times.

***The procedure of continuous extraction in the biphasic reaction system***

Fructose (99%) (91.0 mg, 0.5 mmol) and choline chloride/citric acid (1.47 g, 3 mmol) were added into the reactor in an constant temperature oil bath of 80 °C, and the reaction mixture was stirred. After certain time, ethyl acetate was pumped into the IL phase (0.20 mL/min). During the reaction, the ethyl acetate phase flowed out from the reactor after pumping AcOEt for 15 min. After desired time, the reactor was taken out from the constant temperature oil bath, and the residual ethyl acetate phase was poured out from the reactor and was combined with the flowed-out ethyl acetate solution. The amounts of HMF in the two phases were analyzed by HPLC respectively and the yield was calculated. Each procedure had been repeated at least three times.

## Supporting Scheme

### Supporting Scheme S1.

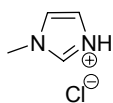

1-H-3-methyl imidazolium chloride  
([HMim]Cl)

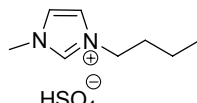

1-butyl-3-methyl imidazolium hydrosulfate  
([BMim]HSO<sub>4</sub>)

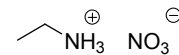

ethylammonium nitrate  
(EtNH<sub>3</sub>NO<sub>3</sub>)

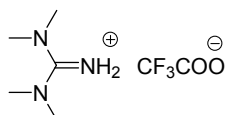

1,1,3,3-tetramethylguanidinium trifluoroacetate  
(TMG TFA)

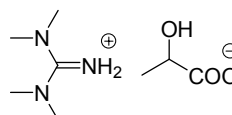

1,1,3,3-tetramethylguanidinium lactate  
(TMG LAC)

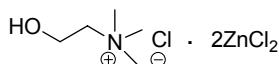

ChoCl / ZnCl<sub>2</sub>

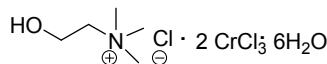

ChoCl / CrCl<sub>3</sub>

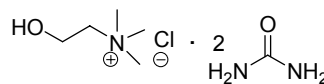

ChoCl / urea

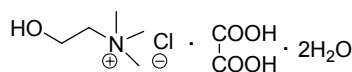

ChoCl / oxalic acid

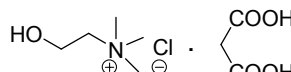

ChoCl / malonic acid

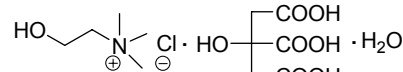

ChoCl / citric acid

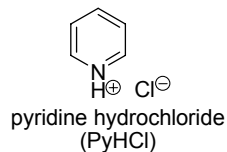

pyridine hydrochloride  
(PyHCl)

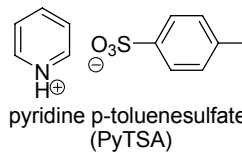

pyridine p-toluenesulfate  
(PyTSA)

## Supporting Tables

**Supporting Table S1.** Molar ratios of choline chloride (ChoCl) to molecular donor.

| IL                        | Molecular donor                        | Molar ratio |
|---------------------------|----------------------------------------|-------------|
| ChoCl/urea                | urea                                   | 1:2         |
| ChoCl/ZnCl <sub>2</sub>   | anhydr. ZnCl <sub>2</sub>              | 1:2         |
| ChoCl/CrCl <sub>3</sub>   | CrCl <sub>3</sub> • 6 H <sub>2</sub> O | 1:2         |
| ChoCl/malonic acid        | malonic acid                           | 1:1         |
| ChoCl/oxalic acid         | oxalic acid • 2H <sub>2</sub> O        | 1:1         |
| ChoCl/citric acid         | citric acid • H <sub>2</sub> O         | 2:1         |
| ChoCl/anhydr. citric acid | anhydr. citric acid                    | 2:1         |

**Supporting Table S2.** Results of the conversion of HMF from fructose in ChoCl/citric acid and pyridine hydrochloride (PyHCl).

| Entry | Ionic liquid      | Molar ratio | Temperature (°C) | Time (h) | Yield (%) | Conversion (%) | Selectivity (%) |
|-------|-------------------|-------------|------------------|----------|-----------|----------------|-----------------|
| 1     | ChoCl/citric acid | 2           | 80               | 1        | 41.3      | 83.0           | 49.4            |
| 2     | ChoCl/citric acid | 3           | 80               | 1        | 54.3      | 86.0           | 63.1            |
| 3     | ChoCl/citric acid | 4           | 80               | 1        | 67.0      | 89.0           | 75.1            |
| 4     | ChoCl/citric acid | 5           | 80               | 1        | 76.3      | 91.1           | 83.8            |
| 5     | ChoCl/citric acid | 6           | 80               | 1        | 77.8      | 93.2           | 83.5            |
| 6     | ChoCl/citric acid | 7           | 80               | 1        | 78.1      | 93.2           | 84.4            |
| 7     | ChoCl/citric acid | 6           | 80               | 0.5      | 60.7      | 85.2           | 71.2            |
| 8     | ChoCl/citric acid | 6           | 80               | 2        | 77.2      | 95.4           | 80.9            |
| 9     | ChoCl/citric acid | 6           | 80               | 3        | 77.7      | 96.5           | 80.5            |
| 10    | ChoCl/citric acid | 6           | 70               | 1        | 41.3      | 45.3           | 91.2            |
| 11    | ChoCl/citric acid | 6           | 90               | 1        | 76.4      | 94.2           | 81.1            |
| 12    | ChoCl/citric acid | 6           | 100              | 1        | 75.6      | 94.6           | 80.0            |
| 13    | PyHCl             | 1           | 80               | 1        | 36.0      | 81.2           | 44.3            |
| 14    | PyHCl             | 2           | 80               | 1        | 51.0      | 87.8           | 58.1            |
| 15    | PyHCl             | 3           | 80               | 1        | 61.8      | 93.5           | 66.1            |
| 16    | PyHCl             | 4           | 80               | 1        | 66.9      | 94.4           | 70.9            |
| 17    | PyHCl             | 5           | 80               | 1        | 69.4      | 92.1           | 75.4            |
| 18    | PyHCl             | 6           | 80               | 1        | 72.3      | 96.9           | 74.6            |
| 19    | PyHCl             | 7           | 80               | 1        | 69.1      | 95.6           | 72.3            |

Fructose (99%) 91.0mg 0.5 mmol, the molar ratio of ILs to fructose is from 1 to 7.

**Supporting Table S3.** HMF converted from Fructose in the biphasic system of Choline chloride/citric acid and AcOEt at 80 °C for 1 h: fructose (99%) 91.0mg 0.5 mmol, choline chloride/citric acid 1.47 g 3 mmol.

| Entry            | $W_{\text{AcOEt}}/W_{\text{IL}}^{[a]}$ | Total yield (%) | Conversion (%) | Selectivity (%) | Yield in AcOEt (%) | $W_{\text{HMF}}/W_{\text{AcOEt}}$ | $W_{\text{HMF}}/W_{\text{IL}}$ | $R^{[b]}$ | Extraction rate (%) <sup>[c]</sup> |
|------------------|----------------------------------------|-----------------|----------------|-----------------|--------------------|-----------------------------------|--------------------------------|-----------|------------------------------------|
| 1                | 0                                      | 77.8            | 93.2           | 83.5            | -                  | -                                 | -                              | -         | -                                  |
| 2 <sup>[d]</sup> | 1                                      | 85.4            | 92.5           | 92.3            | 31.9               | 0.0137                            | 0.0230                         | 0.60      | 37.4                               |
| 3 <sup>[d]</sup> | 2                                      | 86.8            | 94.2           | 92.1            | 47.7               | 0.0102                            | 0.0167                         | 0.61      | 55.0                               |
| 4 <sup>[d]</sup> | 3                                      | 85.6            | 93.2           | 91.8            | 55.6               | 0.0079                            | 0.0129                         | 0.61      | 64.9                               |
| 5 <sup>[e]</sup> | 1+1+1                                  | 82.1            | 91.7           | 89.5            | 63.0               | 0.0090 <sup>[g]</sup>             | 0.0082                         | 1.10      | 77.0                               |
| 6 <sup>[f]</sup> | 6.1                                    | 80.7            | 89.8           | 89.9            | 64.3               | 0.0045 <sup>[g]</sup>             | 0.0069                         | 0.65      | 80.0                               |
| 7 <sup>[f]</sup> | 4.9                                    | 91.4            | 97.6           | 93.6            | 66.0               | 0.0058 <sup>[g]</sup>             | 0.0109                         | 0.53      | 72.2                               |

[a]  $W_{\text{AcOEt}}/W_{\text{IL}}$  is the ratio of weight of AcOEt to weight of IL. [b] R is equal to the ratio of  $W_{\text{HMF}}/W_{\text{AcOEt}}$  to  $W_{\text{HMF}}/W_{\text{IL}}$ . [c] Extraction rate is the ratio of yield in AcOEt to the total yield. [d] AcOEt were added into IL phase in the beginning of reaction. [e] The intermittent extraction: added fresh AcOEt ( $W_{\text{AcOEt}}/W_{\text{IL}}=1$ ) into IL phase and poured AcOEt phase out after biphasic system reacted for 20 min, repeated 2 times and the total reaction time was 1 h. [f] The continuous extraction: pumped AcOEt (0.2 mL/min) into the IL mixture after the reaction run for 10 and 20 min, respectively. [g] The average value.

### Supporting references

- [S1] A. P. Abbott, G. Capper, D. L. Davies, R. K. Rasheed and V. Tambyrajah, *Chem. Comm.* 2003, 70-71.
- [S2] A. P. Abbott, D. Boothby, G. Capper, D. L. Davies, R. K. Rasheed, *J. Am. Chem. Soc.* 2004, **126**, 9142-9147.
